# Supplementary material for: Stability of superoxide radicals in glyme solvents for non-aqueous Li–O2 battery electrolytes
Source: Royal Society of Chemistry journal article supplement (doi:10.1039/c3cp51531a), 2013-01-01
Supplement: c3cp51531a.pdf [file c3cp51531a.pdf]

## Supplementary Information

for

### Stability of superoxide radicals in glyme solvents for non-aqueous Li-O<sub>2</sub> battery electrolytes

K. Uta Schwenke, Stefano Meini, Xiaohan Wu, Hubert A. Gasteiger and Michele Piana

*Institute of Technical Electrochemistry, Technische Universität München,*

*Lichtenbergstr. 4, D-85748 Garching, Germany*

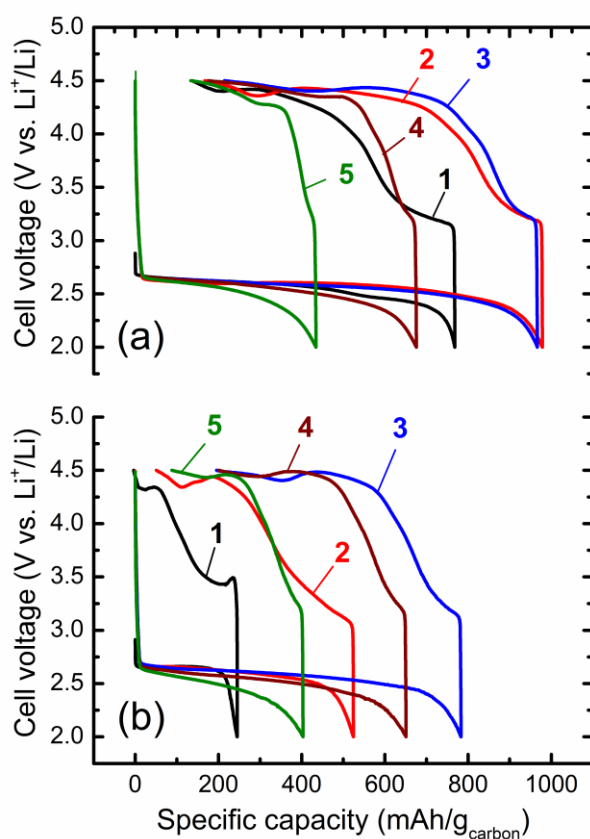

**Figure S1.** Cell voltage profiles of the first five cycles of Li-O<sub>2</sub> cells using as electrolyte 0.2 M LiTFSI in (a) tetraglyme as-received and (b) distilled tetraglyme.
